# Supplementary material for: Glycolysis upregulation is neuroprotective as a compensatory mechanism in ALS
Source: eLife journal article supplement (doi:10.7554/elife.45114), 2019-06-10
Supplement: figures [file elife-45114-figures-v1.pdf]

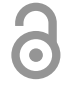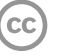

---

## Figures and figure supplements

Glycolysis upregulation is neuroprotective as a compensatory mechanism in ALS

**Ernesto Manzo et al**

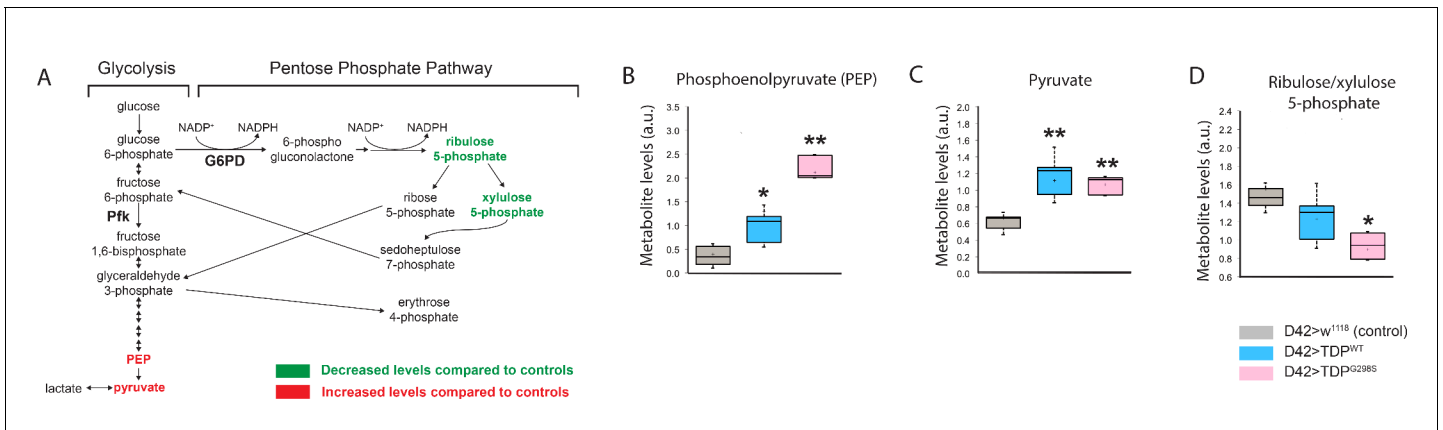

**Figure 1.** Glycolysis and pentose phosphate pathways are altered by TDP-43 expression in motor neurons. (A) Metabolite changes in glycolysis for whole larvae expressing TDP-43<sup>WT</sup> or TDP-43<sup>G298S</sup> were analyzed using mass spectrometry (see Materials and methods). Green and red font represent metabolites that are significantly changed compared to controls (w<sup>1118</sup>), as indicated. PEP and pyruvate were upregulated in both TDP-43<sup>WT</sup> and TDP-43<sup>G298S</sup> expressing flies. Changes in the pentose phosphate pathway metabolites are specific to larvae expressing TDP-43<sup>G298S</sup>. (B, C, D) Significant changes in select metabolites shown as box and whisker plots. Whiskers represent maximum and minimum values. Box edges represent upper and lower quartiles. Median values are denoted by horizontal lines within each box. One-way ANOVA was used to identify metabolites that differed significantly between experimental groups (N = 5).

DOI: <https://doi.org/10.7554/eLife.45114.002>

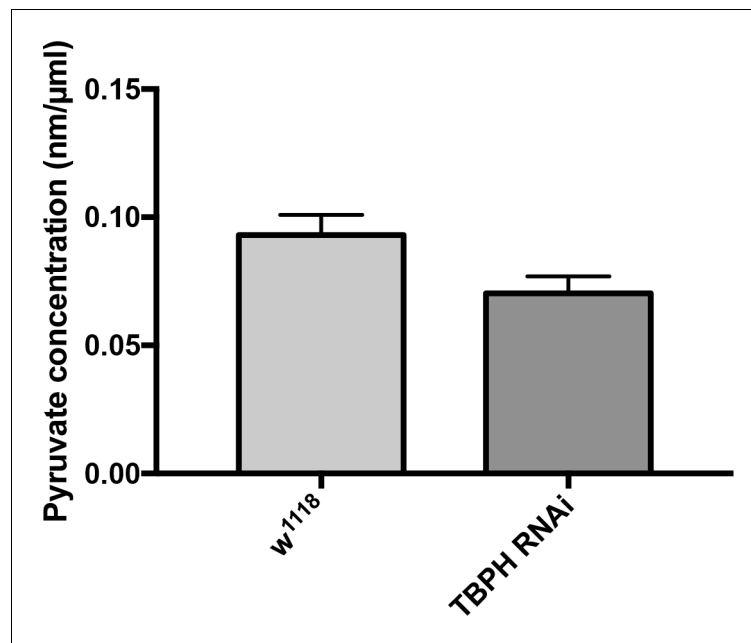

**Figure 1—figure supplement 1.** Pyruvate measurements in whole larvae expressing RNAi knock-down constructs for the endogenous *Drosophila* TDP-43 (TBPH) with the D42 GAL driver show no significant changes compared to w<sup>1118</sup> controls.  $P_{\text{value}} = 0.092$  (Student's t test).

DOI: <https://doi.org/10.7554/eLife.45114.003>

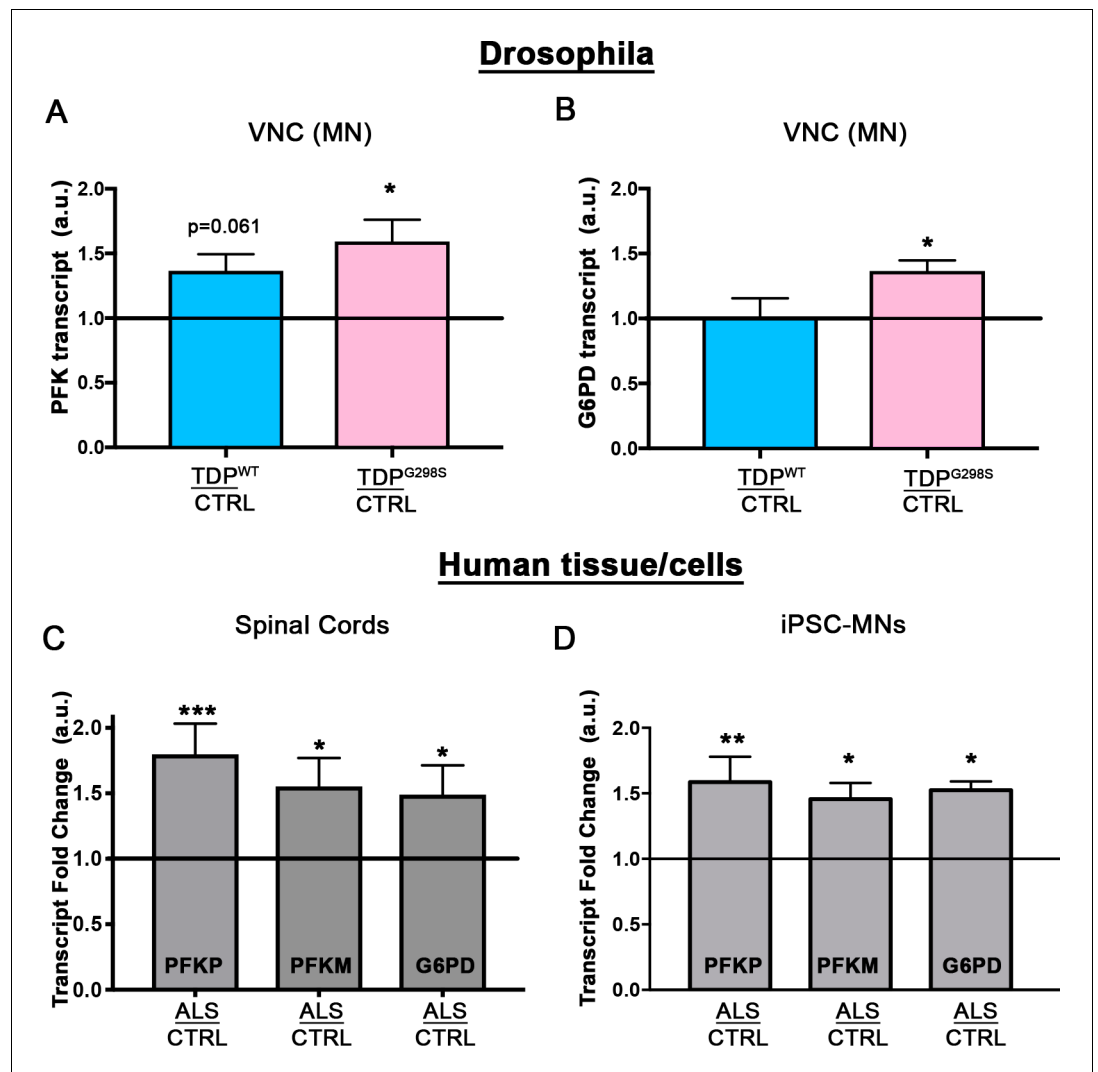

**Figure 2.** Glycolytic enzymes are transcriptionally upregulated. qPCR profiling of *PFK* (A; N = 5) and *G6PD* (B; N = 5) from ventral nerve cords of *Drosophila*. Human *PFKP*, *PFKM*, or *G6PD* mRNA levels were profiled in either spinal cords (C; N = 8 control and 9 ALS cases) or human iPSCs (D; N = 3 differentiations). Kruskal-Wallis test was used to identify significance.

DOI: <https://doi.org/10.7554/eLife.45114.006>

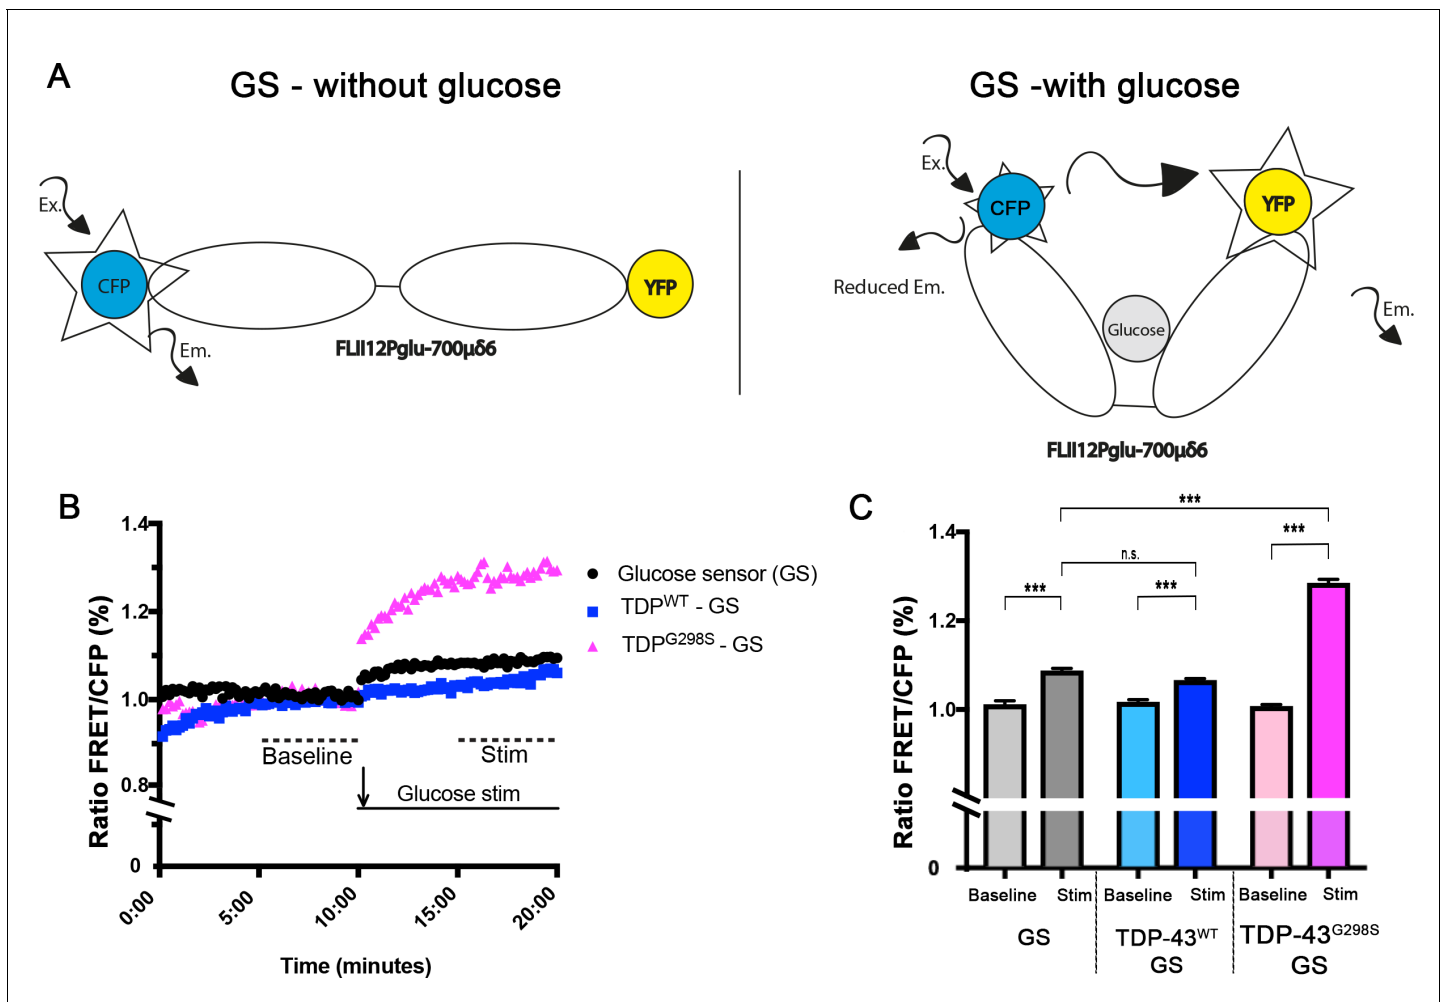

**Figure 3.** TDP expressing neurons have altered capacity to import glucose. FRET based glucose sensor described in *Volkenhoff et al. (2018)* was used to measure the glucose import capacity. Glucose sensor schematic described in (A). Ex – Excitation; Em – Emission. (B, C) TDP-43 expressing neurons and controls were imaged to detect CFP and FRET signal. 12–14 neurons were imaged every 10 s for 20 min. Values shown are the mean of 12–14 individual cells (ROI) from two ventral nerve cords (B). Mean values for 5–10 min and 15–20 min time intervals were used to calculate the ‘baseline’ and ‘stimulated’ (‘Stim’) values respectively (C). Kruskal-Wallis test was used to calculate significance.

DOI: <https://doi.org/10.7554/eLife.45114.008>

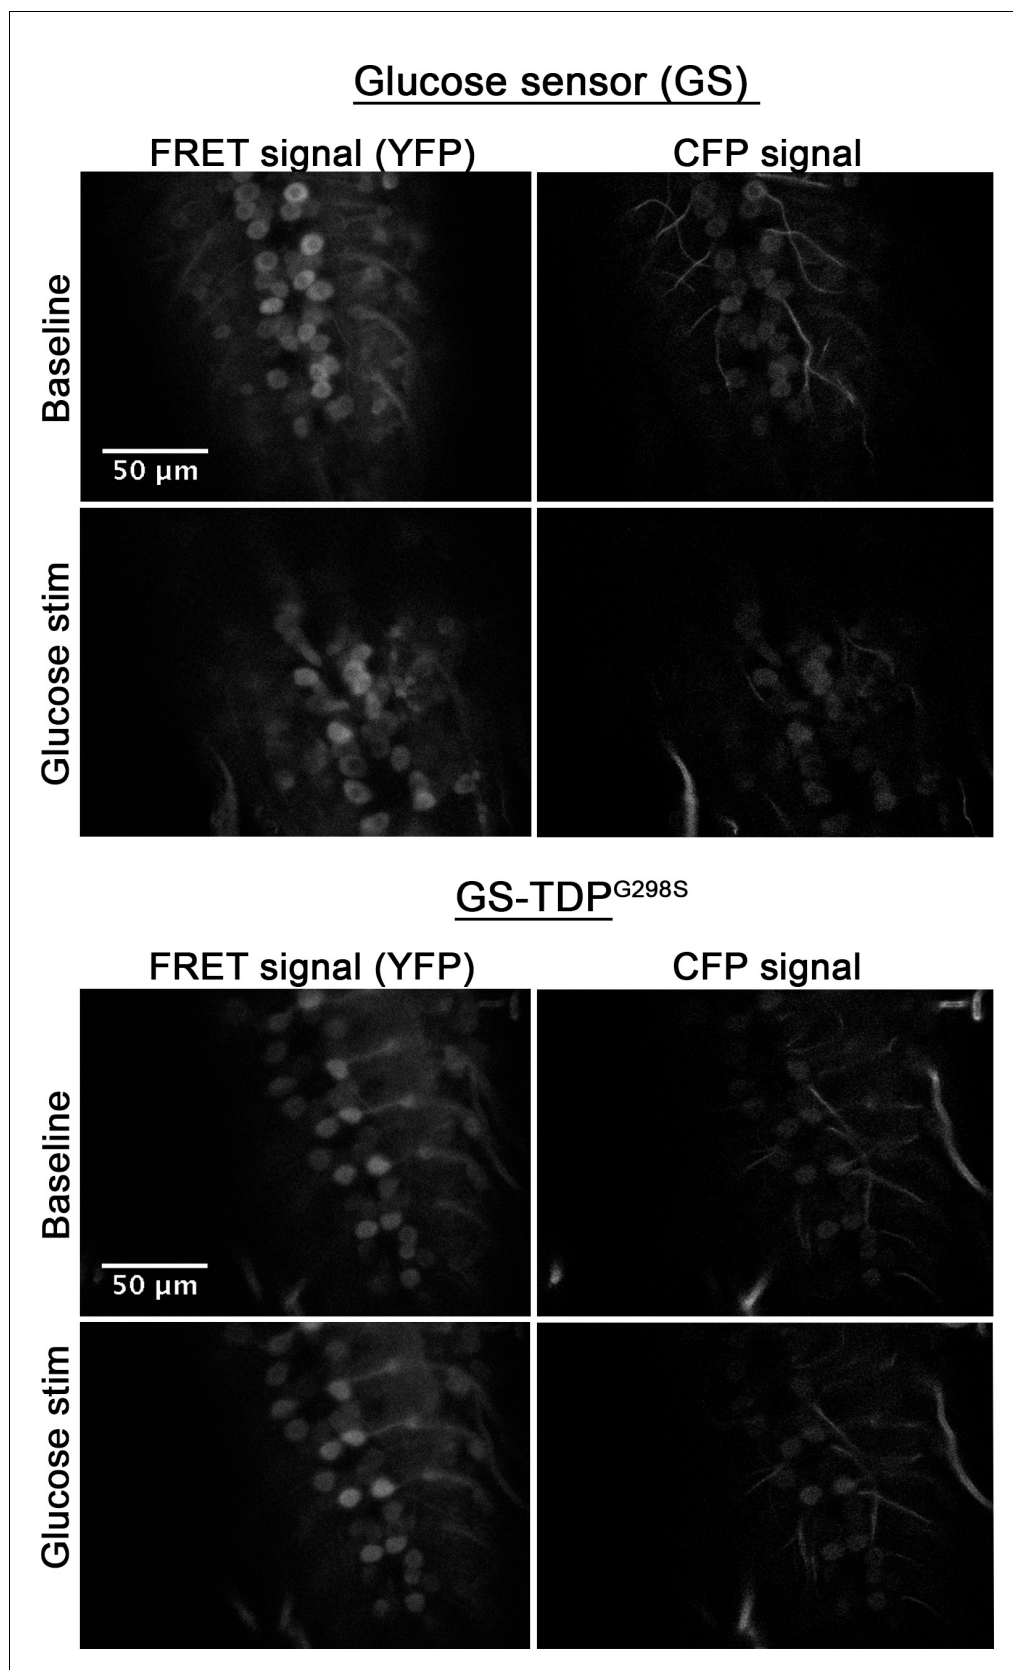

**Figure 3—figure supplement 1.** Raw images of glucose sensor (A) or glucose sensor in the context of TDP-43<sup>G298S</sup> (B). Sections shown are taken through the ventral nerve cord 7.5 min post mounting (baseline) and 7.5 min after glucose stimulation. *Figure 3—figure supplement 1 continued on next page*

*Figure 3—figure supplement 1 continued*

post stimulation (Glucose stim), as indicated. See Materials and methods for details on imaging and analyses.  
Scale bar as shown.

DOI: <https://doi.org/10.7554/eLife.45114.009>

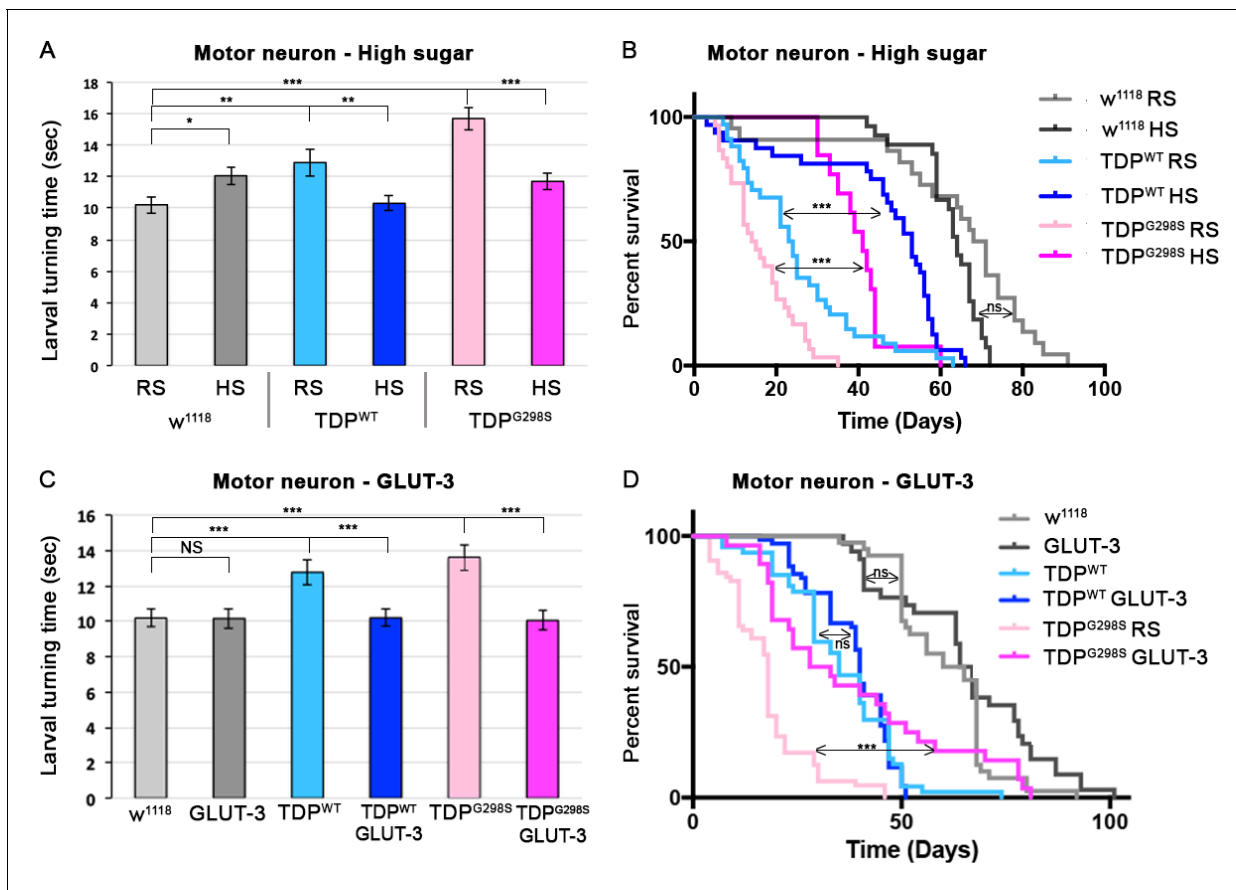

**Figure 4.** A high glucose diet rescues neuronal TDP-43 toxicity in flies. TDP-43<sup>WT</sup> or ALS associated TDP-43<sup>G298S</sup> were expressed in MNs (using GAL4-UAS). (A, B) Larval turning and lifespan assays for *Drosophila* fed a cornmeal based food containing either regular concentration of sugar (RS) or a high sugar diet (HS:10x the standard amount of sugar). (C, D) Larval turning and lifespan assays for *Drosophila* expressing GLUT-3 on its own or with TDP-43, as indicated. At least 30 larvae were tested in larval turning assays and on average 20 adults were assayed for survival. Kruskal-Wallis test and Log-rank (Mantel-Cox) test was used to determine statistical significance for larval turning and survival curve respectively. \* - p<0.05, \*\* - p<0.01, \*\*\* - p<0.001. DOI: <https://doi.org/10.7554/eLife.45114.011>



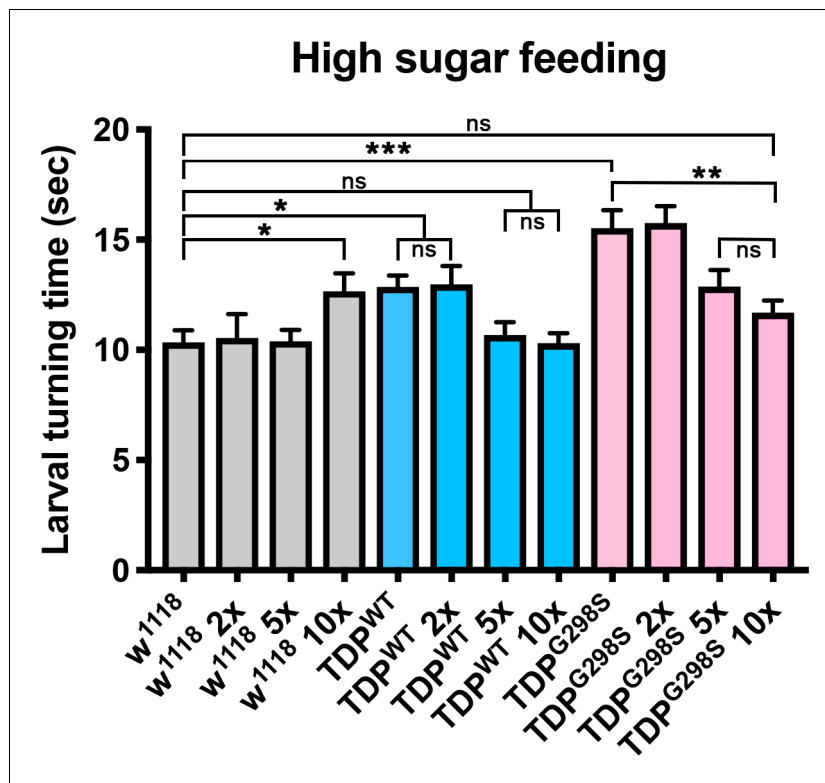

**Figure 4—figure supplement 1.** Larval turning assays on regular cornmeal-molasses food supplemented with various amounts of glucose (2X, 5X or 10X, as shown). Genotypes as indicated. N = 30 larvae. Kruskal-Wallis test was used to determine statistical significance.

DOI: <https://doi.org/10.7554/eLife.45114.012>

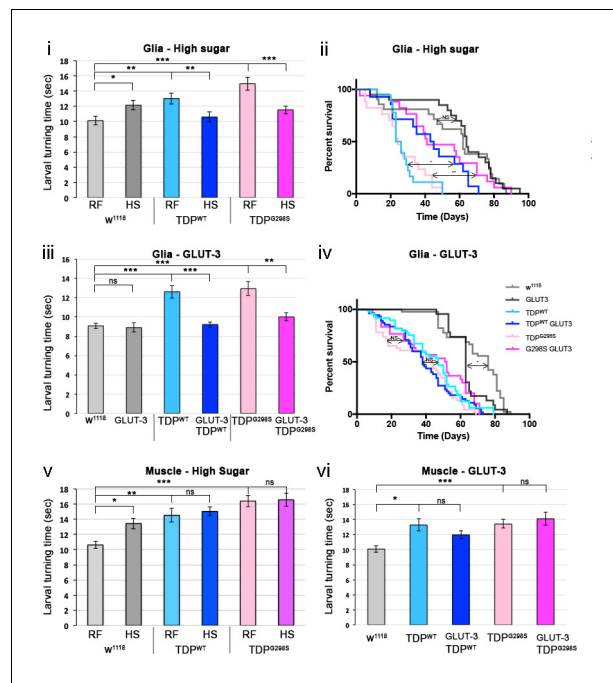

**Figure 4—figure supplement 2.** A high sugar diet or GLUT-3 overexpression are partially protective when TDP-43 is expressed in glia but not in muscles. (i, ii) Larval turning assays (i) and lifespan assays (ii) on a high sugar diet (HS) compared to a regular sugar diet (RF). Genotypes as indicated. (iii and iv) Larval turning assays (iii) and lifespan assays (iv) for GLUT-3 overexpression alone or in conjunction with TDP-43. Genotypes as indicated. (v and vi) Larval turning assays on HS versus RF (v) or in the context of GLUT-3 and TDP-43 overexpression in muscles (vi). Kruskal-Wallis test was used for larval turning assays and Log-rank or Mantel-Cox tests were used for lifespan assays to determine significance.

DOI: <https://doi.org/10.7554/eLife.45114.014>

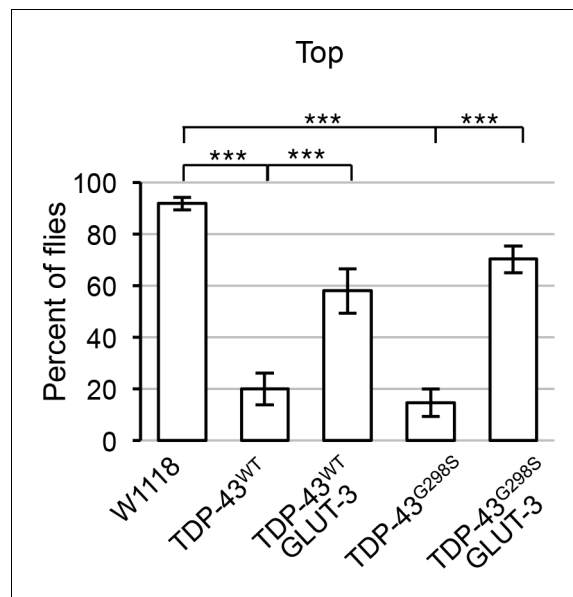

**Figure 4—figure supplement 3.** Negative geotaxis assay on adult flies expressing TDP-43<sup>WT</sup> or TDP-43<sup>G298S</sup> alone or in conjunction with GLUT-3. The percent of flies that reach the top of the column are shown after 60 s. Gene expression was specifically targeted in all neurons by using the elav GAL4 driver. Statistical comparisons were performed using one-way ANOVA followed by Tukey's multiple-comparison test. DOI: <https://doi.org/10.7554/eLife.45114.016>

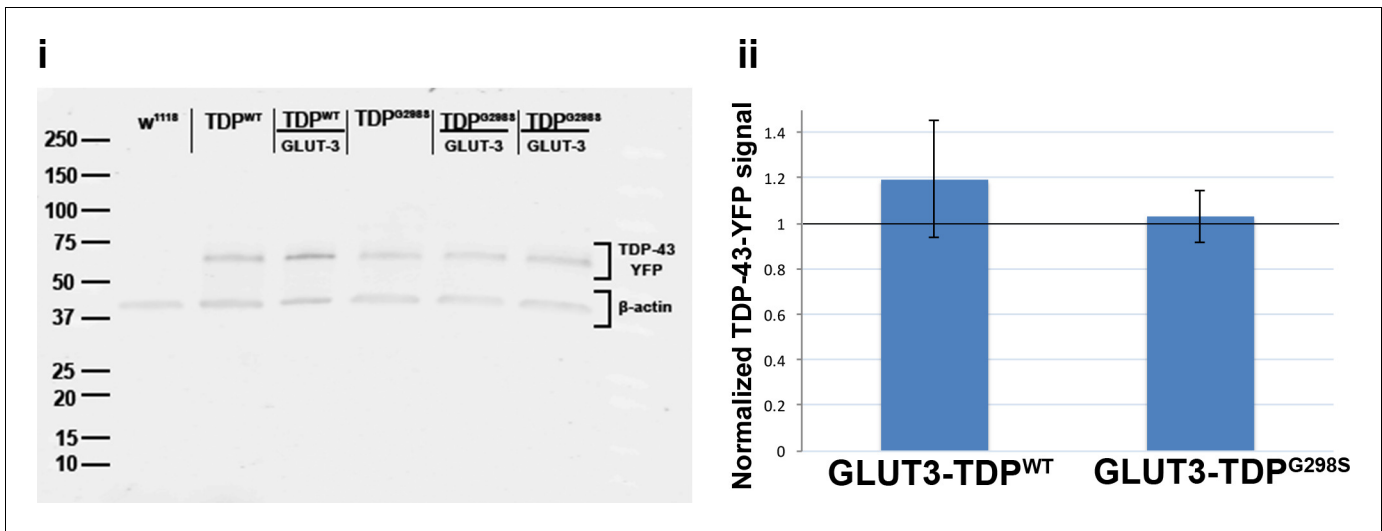

**Figure 4—figure supplement 4.** GLUT-4 overexpression mitigates locomotor defects when TDP-43 is expressed in motor neurons or glia but not muscles. (i) Western blot of ventral nerve cords probing for TDP-43-YFP and β-actin. D42 motor neuron driver was used to express TDP-43 in motor neurons. (ii) Quantification of 3 western blot bioreplicates. Protein levels measured by GFP western blot (to detect TDP-YFP) are shown as a ratio between GLUT-3-TDP<sup>WT</sup>-YFP to TDP<sup>WT</sup>-YFP alone and GLUT-3-TDP<sup>G298S</sup>-YFP to TDP<sup>G298S</sup>-YFP alone.

DOI: <https://doi.org/10.7554/eLife.45114.017>

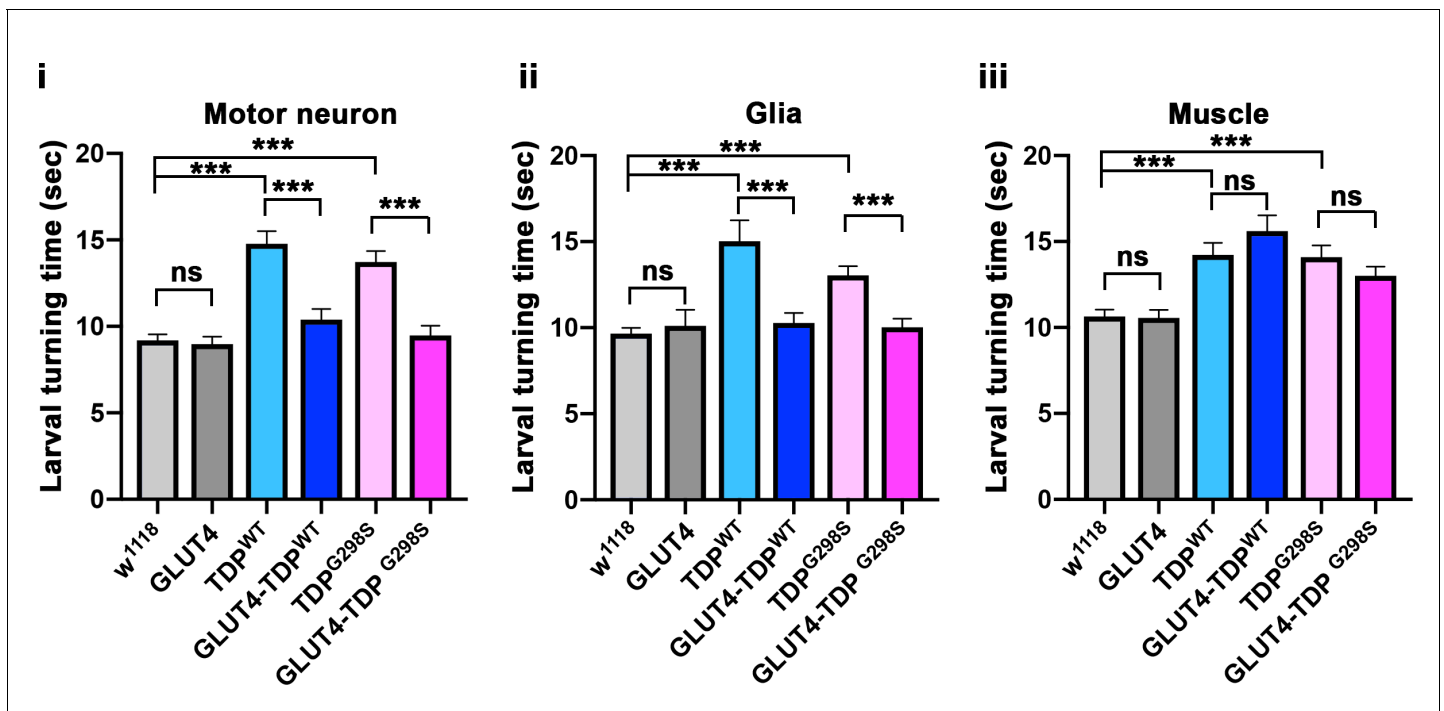

**Figure 4—figure supplement 5.** Larval turning assays for GLUT-4 and TDP-43 overexpression in motor neurons (i), glia (ii) or muscles (iii). Genotypes as indicated. N = 30 larvae. Kruskal-Wallis test was used to determine statistical significance.

DOI: <https://doi.org/10.7554/eLife.45114.019>

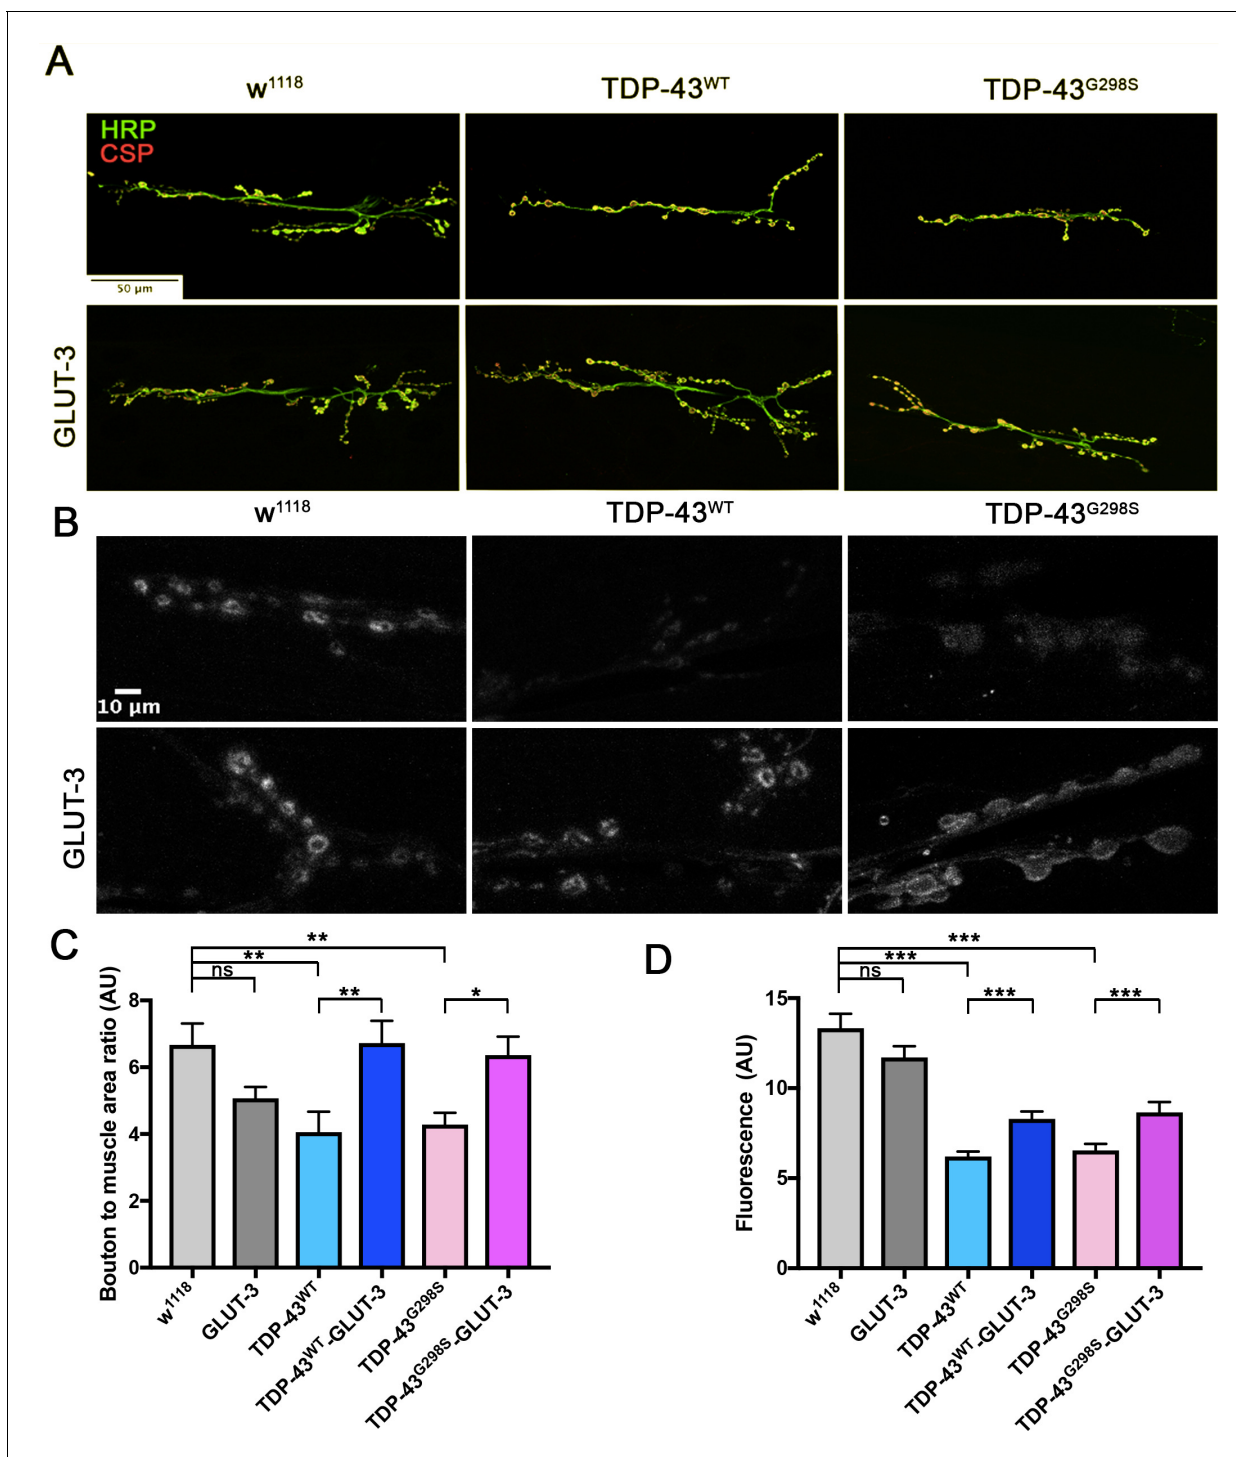

**Figure 5.** TDP-43 dependent defects at the NMJ are rescued by GLUT-3. Third instar larvae NMJ from segment A3, muscle 6/7 were immunostained for CSP and HRP (A) or analyzed for their ability to endocytose FM1-43 dye upon stimulation with 90 mM KCl (B). (A, C) Neuronal TDP-43 expression in *Drosophila* neurons reduces the number of boutons (labeled with CSP and HRP (A, C) and reduces FM1-43 dye uptake (B, D). These morphological (A, C) and functional (B, D) deficits are rescued by co-expression of GLUT-3. N = 7–10 larvae. Kruskal-Wallis test was used to identify significance.

DOI: <https://doi.org/10.7554/eLife.45114.022>

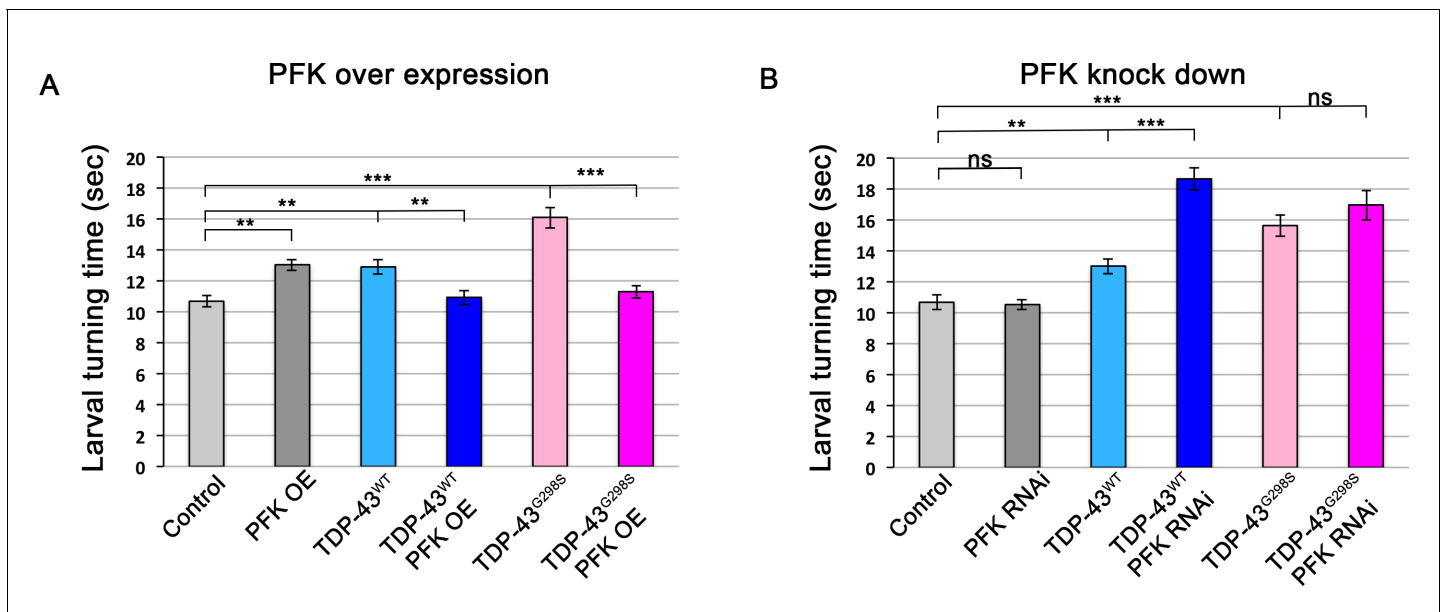

**Figure 6.** Co-overexpression of *PFK* rescues TDP-43 induced locomotor defects. (A) TDP-43<sup>WT</sup> or ALS associated TDP-43<sup>G298S</sup> were expressed in MNs (using the GAL4-UAS system together with *Drosophila* UAS-*PFK*). (B) TDP-43<sup>WT</sup> or ALS associated TDP-43<sup>G298S</sup> were expressed in MNs (using the GAL4-UAS system together with *Drosophila* UAS-*PFK*<sup>RNAi</sup>). N = 30 larvae. Kruskal-Wallis was used to determine statistical significance. \* - P<sub>value</sub> < 0.05, \*\* - P<sub>value</sub> < 0.01, \*\*\* - P<sub>value</sub> < 0.001.

DOI: <https://doi.org/10.7554/eLife.45114.024>

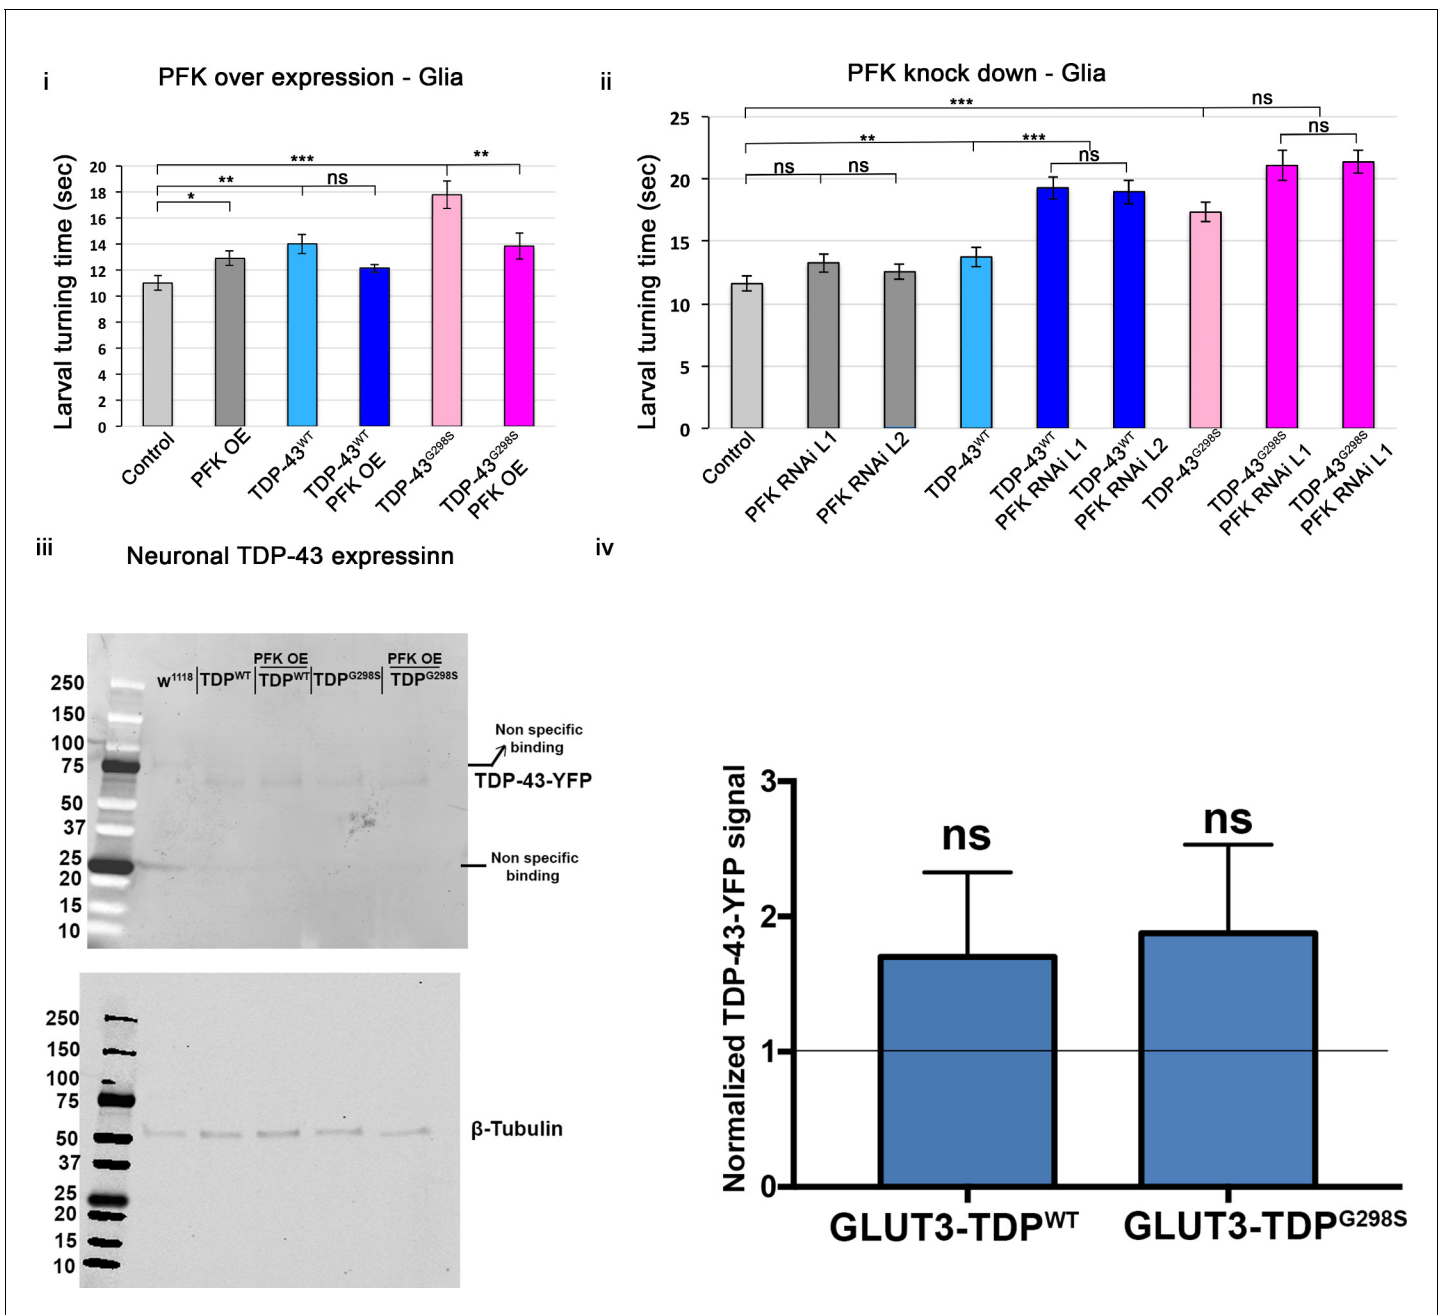

**Figure 6—figure supplement 1.** Larval turning assays for *PFK* overexpression (i) or RNAi (ii) in the context of TDP-43 in glia. Genotypes as indicated. N = 30 larvae. Kruskal-Wallis test was used to determine statistical significance. (iii) Western blot of ventral nerve cords probing for TDP-43-YFP and tubulin. D42 motor neuron driver was used to express TDP-43 in motor neurons. ii. Quantification of 3 western blot bioreplicates. Protein levels measured by GFP western blot (to detect TDP-YFP) are shown as a ratio between *PFK* OE - TDP<sup>WT</sup>-YFP to TDP<sup>WT</sup>-YFP alone and *PFK* OE - TDP<sup>G298S</sup>-YFP to TDP<sup>G298S</sup>-YFP alone.

DOI: <https://doi.org/10.7554/eLife.45114.025>



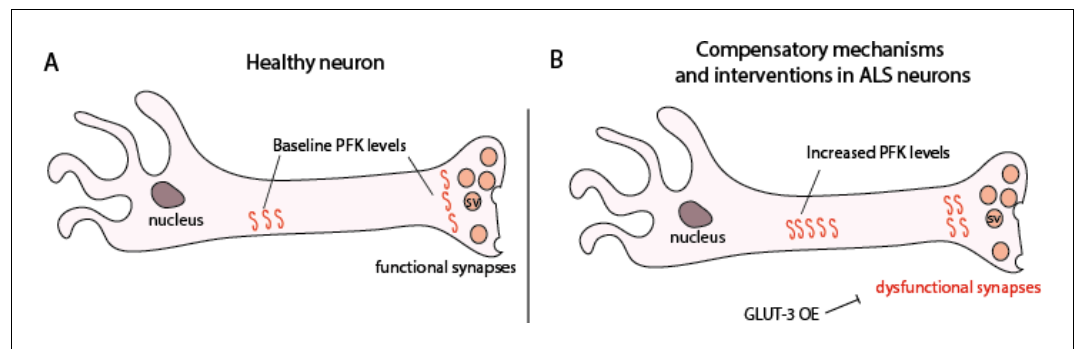

**Figure 7.** Proposed model showing *PFK* transcript levels increase in response to TDP-43 proteinopathy. (A) Neurons from non-diseased patients. (B) ALS neurons showing an increase in *PFK* transcript levels. SV – synaptic vesicle.

DOI: <https://doi.org/10.7554/eLife.45114.028>

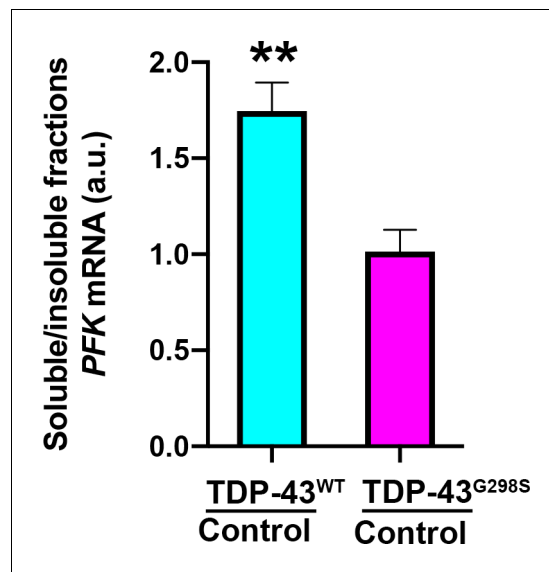

**Figure 7—figure supplement 1.** Cellular fractionations from third instar larvae. TDP<sup>WT</sup> (A) or TDP<sup>G298S</sup> (B) were fractionated (see supplemental materials and methods above) and *PFK* transcript levels in the urea fraction were quantified and normalized to controls (*w*<sup>1118</sup>). Wilcoxon ranked sum test was used to perform statistics.

DOI: <https://doi.org/10.7554/eLife.45114.029>
